# Supplementary material for: Child and Youth Chronic Physical Health Conditions: A Comparison of Survey Data and Linked Administrative Health Data in Ontario
Source: Research Square preprint supplement (doi:10.21203/rs.3.rs-5089891/v1), 2025-04-09
Supplement: Supplementary file 1 [file 07afe3e641522482c604af4b.docx]

# **Supplemental Material**

**Supplemental Material A: The RECORD statement: Checklist of items extended from the STROBE statement that should be reported in observational studies using routinely collected health data**

**Table A.1** The RECORD Statement (Benchimol et al., 2015)

*The RECORD Statement (Benchimol et al., 2015)*

|  | **Item No.** | **STROBE items** | **Location in manuscript where items are reported** | **RECORD items** | **Location in manuscript where items are reported** |
| --- | --- | --- | --- | --- | --- |
| **Title and abstract** | | | | | |
|  | 1 | (a) Indicate the study’s design with a commonly used term in the title or the abstract (b) Provide in the abstract an informative and balanced summary of what was done and what was found | Introduction | RECORD 1.1: The type of data used should be specified in the title or abstract. When possible, the name of the databases used should be included.  RECORD 1.2: If applicable, the geographic region and timeframe within which the study took place should be reported in the title or abstract.  RECORD 1.3: If linkage between databases was conducted for the study, this should be clearly stated in the title or abstract. | Introduction  Introduction  Introduction |
| **Introduction** | | | | | |
| Background rationale | 2 | Explain the scientific background and rationale for the investigation being reported | Page 3 (Existing Algorithms) |  |  |
| Objectives | 3 | State specific objectives, including any prespecified hypotheses | Page 5 (Objectives) |  |  |
| **Methods** | | | | | |
| Study Design | 4 | Present key elements of study design early in the paper | Page 6 (Methods, Data) |  |  |
| Setting | 5 | Describe the setting, locations, and relevant dates, including periods of recruitment, exposure, follow-up, and data collection | Page 6 (Methods, Data), Figure 1, Figure 2 |  |  |
| Participants | 6 | *(a) Cohort study* - Give the eligibility criteria, and the sources and methods of selection of participants. Describe methods of follow-up  *Case-control study* - Give the eligibility criteria, and the sources and methods of case ascertainment and control selection. Give the rationale for the choice of cases and controls  *Cross-sectional study* - Give the eligibility criteria, and the sources and methods of selection of participants  *(b) Cohort study* - For matched studies, give matching criteria and number of exposed and unexposed  *Case-control study* - For matched studies, give matching criteria and the number of controls per case | Page 6 (Methods, Data) | RECORD 6.1: The methods of study population selection (such as codes or algorithms used to identify subjects) should be listed in detail. If this is not possible, an explanation should be provided.  RECORD 6.2: Any validation studies of the codes or algorithms used to select the population should be referenced. If validation was conducted for this study and not published elsewhere, detailed methods and results should be provided.  RECORD 6.3: If the study involved linkage of databases, consider use of a flow diagram or other graphical display to demonstrate the data linkage process, including the number of individuals with linked data at each stage. | Page 6 (Methods, Data)  Page 14 (Developing the CHC Algorithm)  Page 14-16 (Establishing Reference Period and Minimum Visit Frequency)  Figure 2 |
| Variables | 7 | Clearly define all outcomes, exposures, predictors, potential confounders, and effect modifiers. Give diagnostic criteria, if applicable. | Page 10-11 (Predictors)  Page 25 (Outcome)  Diagnostic Criteria (see Supplemental Material A, Table A.2) | RECORD 7.1: A complete list of codes and algorithms used to classify exposures, outcomes, confounders, and effect modifiers should be provided. If these cannot be reported, an explanation should be provided. | Supplemental Material A, Table A.1 and Table A.2 |
| Data sources/ measurement | 8 | For each variable of interest, give sources of data and details of methods of assessment (measurement).  Describe comparability of assessment methods if there is more than one group | Page 10-11 (Predictors), Table 1 |  |  |
| Bias | 9 | Describe any efforts to address potential sources of bias | Page 9 (removal of DD/ID as a confounder) |  |  |
| Study size | 10 | Explain how the study size was arrived at | Figure 2 |  |  |
| Quantitative variables | 11 | Explain how quantitative variables were handled in the analyses. If applicable, describe which groupings were chosen, and why | Table 1 |  |  |
| Statistical methods | 12 | (a) Describe all statistical methods, including those used to control for confounding  (b) Describe any methods used to examine subgroups and interactions  (c) Explain how missing data were addressed  (d) *Cohort study* - If applicable, explain how loss to follow-up was addressed  *Case-control study* - If applicable, explain how matching of cases and controls was addressed  *Cross-sectional study* - If applicable, describe analytical methods taking account of sampling strategy  (e) Describe any sensitivity analyses | a) see Data Analyses  b) Section 2.3.2  c) see Golden, G. (2024). Mental Health Service Use among Children and Youth with Co-Occurring Health and Mental Health Disorders in Ontario. *Electronic Thesis and Dissertation Repository*. https://ir.lib.uwo.ca/etd/10280  (Section: Missing Values)  d) N/A  e) Page 17 (Sensitivity Analyses) |  |  |
| Data access and cleaning methods |  | .. |  | RECORD 12.1: Authors should describe the extent to which the investigators had access to the database population used to create the study population.  RECORD 12.2: Authors should provide information on the data cleaning methods used in the study. | Data were from the cross-sectional 2014 Ontario Child Health Study (OCHS-2014; Boyle et al., 2019), see Data Access Statement  Table 1 |
| Linkage |  | .. |  | RECORD 12.3: State whether the study included person-level, institutional-level, or other data linkage across two or more databases. The methods of linkage and methods of linkage quality evaluation should be provided. | Table 2 |
| **Results** | | | | | |
| Participants | 13 | (a) Report the numbers of individuals at each stage of the study (*e.g.*, numbers potentially eligible, examined for eligibility, confirmed eligible, included in the study, completing follow-up, and analysed)  (b) Give reasons for non-participation at each stage.  (c) Consider use of a flow diagram | Figure 2 | RECORD 13.1: Describe in detail the selection of the persons included in the study (*i.e.,* study population selection) including filtering based on data quality, data availability and linkage. The selection of included persons can be described in the text and/or by means of the study flow diagram. | Figure 2  Page 9 (Exclusion Criteria) |
| Descriptive data | 14 | (a) Give characteristics of study participants (*e.g.*, demographic, clinical, social) and information on exposures and potential confounders  (b) Indicate the number of participants with missing data for each variable of interest  (c) *Cohort study* - summarise follow-up time (*e.g.*, average and total amount) | a) Table 2  b) Table 2, see sample size for each variable  c) N/A |  |  |
| Outcome data | 15 | *Cohort study* - Report numbers of outcome events or summary measures over time  *Case-control study* - Report numbers in each exposure category, or summary measures of exposure  *Cross-sectional study* - Report numbers of outcome events or summary measures | Table 2, Table 3 |  |  |
| Main results | 16 | (a) Give unadjusted estimates and, if applicable, confounder-adjusted estimates and their precision (e.g., 95% confidence interval). Make clear which confounders were adjusted for and why they were included  (b) Report category boundaries when continuous variables were categorized  (c) If relevant, consider translating estimates of relative risk into absolute risk for a meaningful time period | Page 19-28 (Results) |  |  |
| Other analyses | 17 | Report other analyses done—e.g., analyses of subgroups and interactions, and sensitivity analyses | Page 19-28 (Results)  Supplemental Material B.2 |  |  |
| **Discussion** | | | | | |
| Key results | 18 | Summarise key results with reference to study objectives | Page 29 (Discussion) |  |  |
| Limitations | 19 | Discuss limitations of the study, taking into account sources of potential or imprecision. Discuss both direction and magnitude of any potential bias | Page 31-32 (Limitations) | RECORD 19.1: Discuss the implications of using data that were not created or collected to answer the specific research question(s). Include discussion of misclassification bias, unmeasured confounding, missing data, and changing eligibility over time, as they pertain to the study being reported. | Page 31-32 (Limitations) |
| Interpretation | 20 | Give a cautious overall interpretation of results considering objectives, limitations, multiplicity of analyses, results from similar studies, and other relevant evidence | Page 31-32 (Limitations) and data access statement cautioning opinions and results |  |  |
| Generalisability | 21 | Discuss the generalisability (external validity) of the study results | Page 33 (Conclusion) |  |  |
| **Other Information** | | | | | |
| Funding | 22 | Give the source of funding and the role of the funders for the present study and, if applicable, for the original study on which the present article is based | See Funding Statement |  |  |
| Accessibility of protocol, raw data, and programming code |  | .. |  | RECORD 22.1: Authors should provide information on how to access any supplemental information such as the study protocol, raw data, or programming code. | See Data Access Statement |

**References**

Benchimol, E. I., Smeeth, L., Guttmann, A., Harron, K., Moher, D., Petersen, I., Sørensen, H. T., von Elm, E., Langan, S. M., & RECORD Working Committee. (2015). The REporting of studies Conducted using Observational Routinely-collected health Data (RECORD) statement. *PLoS Medicine*, *12*(10), e1001885. <https://doi.org/10.1371/journal.pmed.1001885>

Boyle, M. H., Georgiades, K., Duncan, L., Comeau, J., Wang, L., & 2014 Ontario Child Health Study Team. (2019). The 2014 Ontario Child Health Study—Methodology. *The Canadian Journal of Psychiatry*, *64*(4), 237–245. <https://doi.org/10.1177/0706743719833675>

**Supplemental Material B: Chronic Physical Health Condition Diagnostic Codes and Algorithm**

**Table B.1** Chronic Physical Health Condition Diagnostic Codes and Related Billing Claim Requirements and Reference Period

*Chronic Physical Health Condition Diagnostic Codes and Related Billing Claim Requirements and Reference Period*

| **Categories** | **Subcategories** | **ICD-9** | **Billing Claims and Reference Period** |
| --- | --- | --- | --- |
| **Neurologic and Neuromuscular** | Brain and spinal cord malformations | 740.0-740.2 = = Anencephalous and similar anomalies | 3 claims, 3 years |
| 741.0-741.9 = Spina bifida | 1 claim, 1 year |
| 742.0-742.9 = Other congenital anomalies of nervous system | 3 claims, 3 years |
| Mental retardation | 317 = Mild intellect disability** | N/A |
| 318.0-318.2 = Other specified intellectual disabilities** | N/A |
| 319 = Intellect disability NOS ** | N/A |
| CNS degeneration and diseases | 330.0-330.9 = Cerebral degeneration usually manifest in childhood | 1 claim, 1 year |
| 334 = Spinocerebellar disease | 1 claim, 1 year |
| 335.0-335.9 = Anterior horn cell disease | 1 claim, 1 year |
| 331.1, 331.11, 331.19, 331.4, 331.8, 331.89, 331.9 = Other cerebral degenerations | 3 claims, 3 years |
| 333.2 = Other extrapyramidal disease and abnormal movement disorders | 3 claims, 3 years |
| 336.1, 336.8 = Other diseases of spinal cord | 3 claims, 3 years |
| 337.9 = Disorders of autonomic nervous system | 3 claims, 3 years |
| 759.5 = Tuberous sclerosis | 3 claims, 3 years |
| Infantile cerebral palsy | 343.0-343.9 = Infantile cerebral palsy | 1 claim, 1 year |
| Epilepsy | 345.01, 345.11, 345.3, 345.41, 345.61, 345.71, 345.81, 345.91 = Epilepsy | 1 claim, 1 year |
| Other disorders of CNS | 341.8 = Other demyelinating diseases of central nervous system | 3 claims, 3 years |
| 349 = Other and unspecified disorders of the nervous system | 3 claims, 3 years |
| 342.90 = Hemiplegia and hemiparesis | 3 claims, 3 years |
| 344.0, 344.81, 344.9 = Other paralytic syndromes | 3 claims, 3 years |
| 348.1, 348.4 = Other conditions of brain | 3 claims, 3 years |
| 780.03, = Persistent vegetative state | 1 claim, 1 year |
| 001.52, 001.53 = Cholera | 3 claims, 3 years |
| Occlusion of cerebral arteries | 434.01, 434.91 = Occlusion of cerebral arteries | 3 claims, 3 years |
| Muscular dystrophies and myopathies | 359.0-359.3 = Muscular dystrophies and other myopathies | 3 claims, 3 years |
| Movement diseases | 332.0, 332.1 = Parkinson’s disease | 1 claim, 1 year |
| 333.0, 333.2, 333.4, 333.5, 333.7, 333.9 = Other extrapyramidal disease and abnormal movement disorders | 3 claims, 3 years |
| **Devices** | **996.2, 996.63 = Complications of peculiar to certain specified procedures** | N/A |
| **V45.2, V53.01, V53.02,** | N/A |
| **02.2, 02.21, 02.22, 02.3, 02.31, 02.32, 02.33, 02.34, 02.35, 02.39, 02.4, 02.41, 02.42, 02.93, 03.7, 03.71, 03.72. 03.79, 03.93, 03.97, 04.92** | N/A |
|  | **Transplantation** | **N/A** | N/A |
| **Cardiovascular** | Heart and great vessel malformations | 745.0-745.3, 745.60-745.69 = Bulbus cordis anomalies and anomalies of cardiac septal closure | 3 claims, 3 years |
| 746 = Other congenital anomalies of heart | 3 claims, 3 years |
| 747.1-747.49, 747.81, 747.89 = Other congenital anomalies of circulatory system | 3 claims, 3 years |
| 035.8, 035.81, 035.82, 035.83, 035.84 = Erysipelas | 3 claims, 3 years |
| Endocardium diseases | 424.0, 424.2, 424.3 = Other diseases of endocardium | 3 claims, 3 years |
| Cardiomyopathies | 425.0-425.4, 425.8 = Cardiomyopathy | 3 claims, 3 years |
| 429.1 = Ill-defined descriptions and complications of heart disease | 3 claims, 3 years |
| Conduction disorder | 426.0 = Conduction disorders | 3 claims, 3 years |
| 427.4 = Cardiac dysrhythmias | 3 claims, 3 years |
| Dysrhythmias | 427.6-427.9 = Cardiac dysrhythmias | 3 claims, 3 years |
| Other | 416.1, 416.8, 416.9 = Chronic pulmonary heart disease | 1 claim, 1 year |
| 428.0, 428.83 = Heart failure | 3 claims, 3 years |
| 429.3 = Ill-defined descriptions and complications of heart disease | 3 claims, 3 years |
| 433.11 = Occlusion and stenosis of precerebral arteries | 3 claims, 3 years |
| 398 = Other rheumatic heart disease | 3 claims, 3 years |
| 429 = All other forms of heart disease | 3 claims, 3 years |
| 447 = Other disorders of arteries | 3 claims, 3 years |
| 459 = Other disorders of circulatory system | 3 claims, 3 years |
| **V45.81 = Other postprocedural states** | N/A |
| **Devices** | **996.0, 996.1, 996.61, 996.62 = Complications of peculiar to certain specified procedures** | N/A |
| **V43.3, V45.0, V53.31, V53.32, V53.39, 00.50, 00.51, 00.53, 00.54, 00.55, 00.57, 17.51, 17.52, 37.41, 37.52, 37.53, 37.54, 37.55, 37.6, 37.60, 37.61, 37.63, 37.65, 37.66, 37.67, 37.68, 37.7, 37.71, 37.72, 37.74, 37.76, 37.79, 37.8, 37.80, 37.81, 37.82, 37.83, 37.85, 37.86, 37.87, 37.89, 37.94, 37.95, 37.96, 37.97, 37.98, 39.81, 39.82, 39.83, 39.84, 39.85, 89.46, 89.47, 89.48, 89.49** | N/A |
|  | **Transplantation** | **996.83 = Complications of peculiar to certain specified procedures** | N/A |
| **V42.1, V42.2, V43.2, 37.5, 37.51** | N/A |
| **Respiratory** | Respiratory malformations | 748.0-748.9 = Congenital anomalies of respiratory system | 3 claims, 3 years |
| Chronic respiratory diseases | 327.25 = Organic sleep disorders | 3 claims, 3 years |
| 416.2 = Chronic pulmonary heart disease | 1 claim, 1 year |
| 516.3, 516.31 = Other alveolar and parietoalveolar pneumonopathy | 3 claims, 3 years |
| 518.84 = Other disease of lung | 3 claims, 3 years |
| 770.4 = Primary atelectasis (other respiratory conditions of fetus and newborn) | 3 claims, 3 years |
| **V45.76** | N/A |
| Cystic fibrosis | 277.0 = Cystic fibrosis | 3 claims, 3 years |
| Other | 030.3, 030.4 = Leprosy | 3 claims, 3 years |
| 032.4, 032.41, 032.49, 032.5, 032.50, 032.59 = Diphtheria | 3 claims, 3 years |
| 519.0 = Other diseases of respiratory system | 3 claims, 3 years |
| **Devices** | 519.0 = Other diseases of respiratory system | 3 claims, 3 years |
| **V44.0, V55.0, V46.0, V46.1, 31.2, 31.21, 31.29, 31.41, 31.74, 33.21, 34.85, 96.55, 97.23** | N/A |
|  | **Transplantation** | **996.84 = Complications of peculiar to certain specified procedures** | N/A |
| **V42.6, 33.5, 33.50, 33.51, 33.52, 33.6** | N/A |
| **Renal and Urologic** | Congenital anomalies | 753.0-753.9 = Congenital anomalies of urinary system | 3 claims, 3 years |
| Chronic renal failure | 585 = Chronic kidney disease | 2 claims, 2 years |
| Other | 055.5, 055.51, 055.52, 055.53, 055.54 = Measles | 3 claims, 3 years |
| 056.4, 056.41, 056.42, 056.7, 056.71, 056.79 = Rubella | 3 claims, 3 years |
| 057.7, 057.71, 057.79 = Other viral exanthemata | 3 claims, 3 years |
| **V45.73, V45.74,** | N/A |
| Chronic bladder diseases | 344.61 = Other paralytic syndromes | 3 claims, 3 years |
| 596.4, 596.53, 596.54 = Other disorders of bladder | 3 claims, 3 years |
| **Devices** | **996.68 = Complications of peculiar to certain specified procedures** | N/A |
| **V44.5, V44.6, V45.1, V53.6, V55.5, V55.6, 38.95, 39.27, 39.42, 39.93, 39.94, 39.95, 54.98, 55.02, 55.03, 55.04, 55.12, 55.93, 55.94, 55.97, 56.5, 56.51, 56.52, 56.6, 56.61, 56.62, 56.72, 56.73, 56.74, 56.75, 57.2, 57.21, 57.22, 59.93, 59.94, 86.07, 96.45, 96.46, 96.47** | N/A |
|  | **Transplantation** | **996.81 = Complications of peculiar to certain specified procedures** | N/A |
| **V42.0, 55.6, 55.61, 55.69** | N/A |
| **Gastrointestinal** | Congenital anomalies | 750.3 = Other congenital anomalies of upper alimentary tract | 3 claims, 3 years |
| 751.1-751.9 = Other congenital anomalies of digestive system | 3 claims, 3 years |
| Chronic liver disease and cirrhosis | 571.4-571.9 = Chronic liver disease and cirrhosis | 1 claim, 1 year |
| Inflammatory bowel diseases | 555.0 = Regional enteritis | 1 claim, 1 year |
| 556.9 = Ulcerative colitis | 1 claim, 1 year |
| Other | 453.0 = Other venous embolism and thrombosis | 3 claims, 3 years |
| 557.1 = Vascular insufficiency of intestine | 3 claims, 3 years |
| 560.2 = Intestinal obstruction without mention of hernia | 3 claims, 3 years |
| 564.7 = Functional digestive disorders, not elsewhere classified | 3 claims, 3 years |
| 536.4 = Disorders of function of stomach | 3 claims, 3 years |
| **V45.3, V45.72, V45.75, 25.3, 25.4, 42.42, 43.9, 43.91, 43.99, 45.63, 45.8, 45.81, 45.82, 45.83, 50.4, 52.6, 52.7, 54.71** | N/A |
| **Devices** | **536.4 = Disorders of function of stomach** | N/A |
| **V44.1-V44.4, V53.50, V53.51, V53.59, V55.1-V55.4, 42.1, 42.10, 42.11, 42.81, 43.1, 43.11, 43.19, 44.12, 44.3, 44.32, 44.38, 44.39, 46.1, 46.13, 46.2, 46.22, 46.23, 46.3, 46.32, 46.4, 46.40, 46.41, 46.43, 96.24, 96.36, 97.02** | N/A |
|  | **Transplantation** | **996.82,996.86,996.87 = Complications of peculiar to certain specified procedures** | N/A |
| **V42.7, V42.83, V42.84,** | N/A |
| **46.97 = Slow virus infections and prion diseases of central nervous system** | N/A |
| **50.5, 50.51, 50.59, 52.8, 52.80, 52.82, 52.83, 52.84, 52.85, 52.86** | N/A |
| **Hematologic or immunologic** | Hereditary anemias | 282.0-282.6 = Hereditary hemolytic anemias | 3 claims, 3 years |
| Aplastic anemias | 284 = Aplastic anemia and other bone marrow failure syndromes | 3 claims, 3 years |
| Hereditary immunodeficiency | 279.0-279.9 = Disorders involving the immune mechanism | 3 claims, 3 years |
| 288.1, 288.2 = Diseases of white blood cells | 3 claims, 3 years |
| 446.1 = Polyarteritis nodosa and allied conditions | 3 claims, 3 years |
| Coagulation/hemorrhagic | 286.0, 286.3 = Coagulation defects | 3 claims, 3 years |
| 287.32, 287.33, 287.39 = Purpura and other hemorrhagic conditions | 3 claims, 3 years |
| Leukopenia | 288.01, 288.02 = Diseases of white blood cells | 3 claims, 3 years |
| Hemophagocytic Syndromes | 288.4 = Diseases of white blood cells | 3 claims, 3 years |
| Sarcoidosis | 135 = Sarcoidosis | 1 claim, 1 year |
| Acquired immunodeficiency | 042 = Human immunodeficiency virus (HIV) infection | 1 claim, 1 year |
| 043 = AIDS-related complex (A.R.C.) | 1 claim, 1 year |
| 044 = Other human immunodeficiency virus infection | 1 claim, 1 year |
| Polyarteritis nodosa and related conditions | 446.0, 446.21, 446.4, 446.7 = Polyarteritis nodosa and allied conditions | 3 claims, 3 years |
| Diffuse diseases of connective tissue | 710.0, 710.1, 710.3 = Diffuse diseases of connective tissue | 3 claims, 3 years |
|  | Other | 041.5 = H. influenzae infect NOS | 3 claims, 3 years |
| **Devices** | **N/A** | N/A |
| **Transplantation** | **41.00, 41.01, 41.02, 41.03, 41.04, 41.05, 41.06, 41.07, 41.08, 41.09, 41.94 = Bacterial infection in conditions classified elsewhere and of unspecified site** | N/A |
| **Metabolic** | Amino acid metabolism | 270.0-270.9 = Disorders of amino-acid transport and metabolism | 3 claims, 3 years |
| Carbohydrate metabolism | 271.0-271.9 = Disorders of carbohydrate transport and metabolism | 3 claims, 3 years |
| Lipid metabolism | 272.0-272.9 = Disorders of lipoid metabolism | 3 claims, 3 years |
| Storage disorder | 277.3, 277.5 = Other and unspecified disorders of metabolism | 3 claims, 3 years |
| Other metabolic disorders | 275.0-275.3 = Disorders of mineral metabolism | 3 claims, 3 years |
| 277.2,277.6, 277.8, 277.9 = Other and unspecified disorders of metabolism | 3 claims, 3 years |
| Endocrine disorders | 243 = Congenital hypothyroidism | 2 claims, 1 year |
| 253.2, 253.5, 253.6, 253.9 = Disorders of the pituitary gland and its hypothalamic control | 3 claims, 3 years |
| 255.0, 255.13, 255.2 = Disorders of adrenal glands | 3 claims, 3 years |
| 006.4, 006.52, 006.81 = Amebiasis | 3 claims, 3 years |
| 007.3, 007.64, 007.65, 007.68, 007.69 = Other protozoal intestinal diseases | 3 claims, 3 years |
| 062.4, 062.41 = Mosquito-borne viral encephalitis | 3 claims, 3 years |
| 064.5 = Viral encephalitis transmitted by other and unspecified arthropods | 3 claims, 3 years |
| 065.5, 065.51, 065.53, 065.6, 065.61, 065.63 = Anthropod-borne hemorrhagic fever | 3 claims, 3 years |
| **68.4, 68.41, 68.49, 68.5, 68.51, 68.59, 68.6, 68.61, 68.69, 68.7, 68.71, 68.79 = hysterectomy procedures** | N/A |
| **Devices** | **V45.85, V53.91, 86.06** | N/A |
|  | **Transplantation** | **N/A** | N/A |
| **Other Congenital or Genetic Defect** | Chromosomal anomalies | 758.0-758.9 = Chromosomal anomalies | 1 claim, 1 year |
| Bone and join anomalies | 259.4 = Other endocrine disorders | 3 claims, 3 years |
| 737.3 = Curvature of spine | 3 claims, 3 years |
| 756.0-756.5 = Other congenital musculoskeletal anomalies | 3 claims, 3 years |
| Diaphragm and abdominal wall | 553.3 = Other hernia of abdominal cavity without mention of obstruction of gangrene | 3 claims, 3 years |
| 756.6, 756.7 = Other congenital musculoskeletal anomalies | 3 claims, 3 years |
| Other congenital anomalies | 757.39 = Congenital anomalies of the integument | 3 claims, 3 years |
| 759.7-759.9 = Other and unspecified congenital anomalies | 3 claims, 3 years |
| **Malignancy** | Neoplasms | 140 = Malignant Neoplasms: Lip | 2 claims, 1 year |
| 141 = Malignant Neoplasms: Tongue | 2 claims, 1 year |
| 142 = Malignant Neoplasms: Major salivary glands | 2 claims, 1 year |
| 143 = Malignant Neoplasms: Gum | 2 claims, 1 year |
| 144 = Malignant Neoplasms: Floor of mouth | 2 claims, 1 year |
| 145 = Malignant Neoplasms: Other and unspecified parts of mouth | 2 claims, 1 year |
| 146 = Malignant Neoplasms: Oropharynx | 2 claims, 1 year |
| 147 = Malignant Neoplasms: Nasopharynx | 2 claims, 1 year |
| 148 = Malignant Neoplasms: Hypopharynx | 2 claims, 1 year |
| 149 = Malignant Neoplasms: Other and ill-defined sites within the lip, oral cavity, and pharynx | 2 claims, 1 year |
| 150 = Malignant Neoplasms: Esophagus | 2 claims, 1 year |
| 151 = Malignant Neoplasms: Stomach | 2 claims, 1 year |
| 152 = Malignant Neoplasms: Small intestine, including duodenum | 2 claims, 1 year |
| 153 = Malignant Neoplasms: Large intestine - excluding rectum | 2 claims, 1 year |
| 154 = Malignant Neoplasms: Rectum, rectosigmoid and anus | 2 claims, 1 year |
| 155 = Malignant Neoplasms: Primary malignancy of liver (not secondary spread or metastatic disease) | 2 claims, 1 year |
| 156 = Malignant Neoplasms: Gallbladder and extra hepatic bile ducts | 2 claims, 1 year |
| 157 = Malignant Neoplasms: Pancreas | 2 claims, 1 year |
| 158 = Malignant Neoplasms: Retroperitoneum and peritoneum | 2 claims, 1 year |
| 159 = Malignant Neoplasms: Other and ill-defined sites within the digestive organs and peritoneum | 2 claims, 1 year |
| 160 = Malignant Neoplasms: Nasal cavities, middle ear, and accessory sinuses | 2 claims, 1 year |
| 161 = Malignant Neoplasms: Larynx, trachea | 2 claims, 1 year |
| 162 = Malignant Neoplasms: Bronchus, lung | 2 claims, 1 year |
| 163 = Malignant Neoplasms: Pleura | 2 claims, 1 year |
| 164 = Malignant Neoplasms: Thymus, heart, and mediastinum | 2 claims, 1 year |
| 165 = Malignant Neoplasms: Other sites within the respiratory system and intrathoracic organs | 2 claims, 1 year |
| 170 = Malignant Neoplasms: Bone | 2 claims, 1 year |
| 171 = Malignant Neoplasms: Connective and other soft tissue | 2 claims, 1 year |
| 172 = Malignant Neoplasms: Melanoma of skin | 2 claims, 1 year |
| 173 = Malignant Neoplasms: Other skin malignancies | 2 claims, 1 year |
| 174 = Malignant Neoplasms: Female breast | 2 claims, 1 year |
| 175 = Malignant Neoplasms: Male breast | 2 claims, 1 year |
| 179 = Malignant Neoplasms: Uterus, part unspecified | 2 claims, 1 year |
| 180 = Malignant Neoplasms: Cervix | 2 claims, 1 year |
| 181 = Malignant Neoplasms: Placenta | 2 claims, 1 year |
| 182 = Malignant Neoplasms: Body of uterus | 2 claims, 1 year |
| 183 = Malignant Neoplasms: Ovary, fallopian tube, broad ligament | 2 claims, 1 year |
| 184 = Malignant Neoplasms: Vagina, vulva, other female genital organs | 2 claims, 1 year |
| 185 = Malignant Neoplasms: Prostate | 2 claims, 1 year |
| 186 = Malignant Neoplasms: Testis | 2 claims, 1 year |
| 187 = Malignant Neoplasms: Other male genital organs | 2 claims, 1 year |
| 188 = Malignant Neoplasms: Bladder | 2 claims, 1 year |
| 189 = Malignant Neoplasms: Kidney, other urinary organs | 2 claims, 1 year |
| 190 = Malignant Neoplasms: Eye | 2 claims, 1 year |
| 191 = Malignant Neoplasms: Brain | 2 claims, 1 year |
| 192 = Malignant Neoplasms: Cranial nerves, spinal cord, other parts of nervous system | 2 claims, 1 year |
| 193 = Malignant Neoplasms: Thyroid | 2 claims, 1 year |
| 194 = Malignant Neoplasms: Other endocrine glands and related structures | 2 claims, 1 year |
| 195 = Malignant Neoplasms: Other ill-defined sites | 2 claims, 1 year |
| 196 = Malignant Neoplasms: Secondary neoplasm of lymph nodes | 2 claims, 1 year |
| 197 = Malignant Neoplasms: Secondary neoplasm of respiratory and digestive systems | 2 claims, 1 year |
| 198 = Malignant Neoplasms: Metastatic or secondary malignant neoplasm, carcinomatosis | 2 claims, 1 year |
| 199 = Malignant Neoplasms: Other malignant neoplasms | 2 claims, 1 year |
| 200 = Malignant Neoplasms: Lymphosarcoma, reticulosarcoma | 2 claims, 1 year |
| 201 = Malignant Neoplasms: Hodgkin's disease | 2 claims, 1 year |
| 202 = Malignant Neoplasms: Other malignant neoplasms of lymphoid and histiocytic tissue | 2 claims, 1 year |
| 203 = Malignant Neoplasms: Multiple myeloma, plasma cell leukemia | 2 claims, 1 year |
| 204 = Malignant Neoplasms: Lymphoid leukemia (including lymphatic and histiocytic leukemia) | 2 claims, 1 year |
| 205 = Malignant Neoplasms: Myeloid leukemia (including granulocytic and myelogenous leukemia) | 2 claims, 1 year |
| 206 = Malignant Neoplasms: Monocytic leukemia | 2 claims, 1 year |
| 207 = Malignant Neoplasms: Other specified leukemia | 2 claims, 1 year |
| 208 = Malignant Neoplasms: Other types of leukemia | 2 claims, 1 year |
| 210 = Benign Neoplasms: Lip, oral cavity, pharynx | 2 claims, 1 year |
| 211 = Benign Neoplasms: Other parts of digestive system, peritoneum | 2 claims, 1 year |
| 212 = Benign Neoplasms: Respiratory and intra-thoracic organs | 2 claims, 1 year |
| 213 = Benign Neoplasms: Bone, cartilage | 2 claims, 1 year |
| 214 = Benign Neoplasms: Lipoma | 2 claims, 1 year |
| 215 = Benign Neoplasms: Connective and other soft tissue | 2 claims, 1 year |
| 216 = Benign Neoplasms: Skin (e.g., pigmented naevus, dermatofibroma) | 2 claims, 1 year |
| 217 = Benign Neoplasms: Breast | 2 claims, 1 year |
| 218 = Benign Neoplasms: Uterine fibroid, leiomyoma | 2 claims, 1 year |
| 219 = Benign Neoplasms: Other benign neoplasms of uterus (e.g., cervical polyp) | 2 claims, 1 year |
| 220 = Benign Neoplasms: Ovary (e.g., ovarian cyst) | 2 claims, 1 year |
| 221 = Benign Neoplasms: Other benign neoplasms of female genital organs | 2 claims, 1 year |
| 222 = Benign Neoplasms: Benign neoplasms of male genital organs | 2 claims, 1 year |
| 223 = Benign Neoplasms: Kidney, ureter, bladder | 2 claims, 1 year |
| 224 = Benign Neoplasms: Eye | 2 claims, 1 year |
| 225 = Benign Neoplasms: Brain, spinal cord, peripheral nerves | 2 claims, 1 year |
| 226 = Benign Neoplasms: Thyroid (e.g., adenoma or cystadenoma) | 2 claims, 1 year |
| 227 = Benign Neoplasms: Other endocrine glands and related structures | 2 claims, 1 year |
| 228 = Benign Neoplasms: Haemangioma and lymphangioma | 2 claims, 1 year |
| 229 = Benign Neoplasms: Other benign neoplasms | 2 claims, 1 year |
| 230 = Carcinoma in Situ: Digestive organs | 2 claims, 1 year |
| 231 = Carcinoma in Situ: Respiratory system | 2 claims, 1 year |
| 232 = Carcinoma in Situ: Skin | 2 claims, 1 year |
| 233 = Carcinoma in Situ: Breast and genito-urinary system | 2 claims, 1 year |
| 234 = Carcinoma in Situ: Other | 2 claims, 1 year |
| 235 = Neoplasms of Uncertain Behavior: Digestive and respiratory systems | 2 claims, 1 year |
| 236 = Neoplasms of Uncertain Behavior: Genitourinary organs | 2 claims, 1 year |
| 237 = Neoplasms of Uncertain Behavior: Endocrine glands and nervous system | 2 claims, 1 year |
| 238 = Neoplasms of Uncertain Behavior: Other and unspecified sites and tissues | 2 claims, 1 year |
| 239 = Neoplasms of Uncertain Behavior: Unspecified neoplasms (e.g., polycythemia vera) | 2 claims, 1 year |
| **Devices** | **N/A** | N/A |
| **Transplantation** | **996.85 = Complications of peculiar to certain specified procedures** | N/A |
| **V42.81, V42.82** | N/A |
| **Premature and Neonatal** | Fetal malnutrition | 764.01, 764.02, 764.11, 764.12, 764.21, 764.22, 764.91, 764.92 = Slow fetal growth and fetal malnutrition | 3 claims, 3 years |
| Extreme immaturity | 765.01, 765.02, 765.11, 765.12, 765.21-765.23 = Disorders relating to short gestation and low birthweight | 3 claims, 3 years |
| Cerebral hemorrhage at birth | 767.0 = Cerebral hem at birth (birth trauma) | 3 claims, 3 years |
| Spinal cord injury at birth | 767.4 = Spinal cord injury at birth (birth trauma) | 3 claims, 3 years |
| Birth asphyxia | 768.5, 768.9 = Intrauterine hypoxia and birth asphyxia | 3 claims, 3 years |
| Respiratory diseases | 770.2, 770.7 = Other respiratory conditions of fetus and newborn | 3 claims, 3 years |
| Hypoxic-ischemic encephalopathy | 768.7 = Intrauterine hypoxia and birth asphyxia | 3 claims, 3 years |
| Other | 771.0, 771.1 = Infections specific to perinatal period | 3 claims, 3 years |
| 772.13, 772.14 = Fetal and neonatal hemorrhage | 3 claims, 3 years |
| 773.3, 773.4 Hemolytic disease of fetus or newborn, due to isoimmunization | 3 claims, 3 years |
| 774.7 = Other perinatal jaundice | 3 claims, 3 years |
| 776.5 =Hematological disorders of newborn | 3 claims, 3 years |
| 777.53 = Perinatal disorders of digestive system | 3 claims, 3 years |
| 778.0 = Conditions involving the integument and temperature regulation of fetus and newborn | 3 claims, 3 years |
| 779.7 = Other and ill-defined conditions originating in the perinatal period | 3 claims, 3 years |
| **Miscellaneous, Not Elsewhere Classified** | **Devices** | **996.4, 996.66, 996.67, 996.9 = Complications of peculiar to certain specified procedures** | N/A |
| **V46.2 81.00, 81.01, 81.02, 81.03, 81.04, 81.05, 81.06, 81.07, 81.08, 81.09, 81.30, 81.31, 81.32, 81.33, 81.34, 81.35, 81.36, 81.37, 81.38, 81.39, 84.51** | N/A |
| **Transplantation** | **996.80, 6.88, 996.89 = Complications of peculiar to certain specified procedures** | N/A |
| **00.91, 00.92, 00.93** | N/A |
| **Additional common pediatric chronic health conditions** | N/A | 490 = Bronchitis NOS | 3 claims, 3 years |
| 491.0-491.9 = Chronic bronchitis | 1 claim, 1 year |
| 691 = Eczema, atopic dermatitis, neurodermatitis | 3 claims, 3 years |
| 708 = Allergic urticaria | 3 claims, 3 years |
| 477 = Allergic rhinitis, hay fever | 3 claims, 3 years |
| 250.00-250.93 = Diabetes mellitus | 1 claim, 1 year |
| 249.00-249.91 = Secondary diabetes mellitus | 1 claim, 1 year |
| 493.00-493.92 = Asthma | 2 claims, 1 year |
| 558.3 = Allergic gastroenteritis and colitis | 3 claims, 3 years |
| 693.1 = Dermatitis due to food | 3 claims, 3 years |
| 995.6 = Anaphylactic shock due to food | 3 claims, 3 years |
| 995.7 = Other adverse food reactions, not specified elsewhere | 3 claims, 3 years |
| V15.01 = Allergy to peanut | 3 claims, 3 years |
| V15.02 = Allergy to milk | 3 claims, 3 years |
| V15.03 = Allergy to egg | 3 claims, 3 years |
| V15.04 = Allergy to seafood | 3 claims, 3 years |
| V15.05 = Allergy to food additives or other nuts | 3 claims, 3 years |
| 278 = Obesity | 3 claims, 3 years |
| 372 = Conjunctiva disorders (e.g., conjunctivitis, pterygium) | 3 claims, 3 years |
| 380 = Otitis externa | 3 claims, 3 years |
| 381 = Serous otitis media, eustachian tube disorders | 3 claims, 3 years |
| 382 = Suppurative otitis media | 3 claims, 3 years |
| 388 = Wax or cerumen in ear, other disorders of ear and mastoid, tinnitus | 3 claims, 3 years |
| 389 = Deafness | 3 claims, 3 years |
| 474 = Hypertrophy or chronic infection of tonsils and/or adenoids | 3 claims, 3 years |
| 626 = Disorders of menstruation | 3 claims, 3 years |

*Note.* Table B.1 provides a list of diagnostic codes based on the pediatric **Chronic Condition Classification (CCC)** system version 2 (Feudtner et al., 2014) and additional common pediatric chronic conditions. See Table B.2 for ICD-9 codes sorted in numerical order.

*Legend.*

**Bolded items** are not being examined inthe current study. Bolded items are 1) ICD-9 codes concerning medical devices and transplantation, and 2) codes 68.4 to 68.9 are procedures related to hysterectomy.

** Diagnostic codes included in Feudtner et al. (2014) but excluded in analyses.

**Table B.2** Administrative Data Chronic Condition Algorithm

*Administrative Data Chronic Condition Algorithm*

| **3 Digit  ICD-9 Code** | **Initial Billing Claim Requirement** | **Incremented Billing Claim Requirement** | **ICD-9 Code (n=219)** | **Reference** | **Rule** |
| --- | --- | --- | --- | --- | --- |
| 140 | 2 claims, 1 year | 2 claims, 1 year | 140 = Malignant Neoplasms: Lip | CCW Codebook | Cancer-related condition |
| 141 | 2 claims, 1 year | 2 claims, 1 year | 141 = Malignant Neoplasms: Tongue | CCW Codebook | Cancer-related condition |
| 142 | 2 claims, 1 year | 2 claims, 1 year | 142 = Malignant Neoplasms: Major salivary glands | CCW Codebook | Cancer-related condition |
| 143 | 2 claims, 1 year | 2 claims, 1 year | 143 = Malignant Neoplasms: Gum | CCW Codebook | Cancer-related condition |
| 144 | 2 claims, 1 year | 2 claims, 1 year | 144 = Malignant Neoplasms: Floor of mouth | CCW Codebook | Cancer-related condition |
| 145 | 2 claims, 1 year | 2 claims, 1 year | 145 = Malignant Neoplasms: Other and unspecified parts of mouth | CCW Codebook | Cancer-related condition |
| 146 | 2 claims, 1 year | 2 claims, 1 year | 146 = Malignant Neoplasms: Oropharynx | CCW Codebook | Cancer-related condition |
| 147 | 2 claims, 1 year | 2 claims, 1 year | 147 = Malignant Neoplasms: Nasopharynx | CCW Codebook | Cancer-related condition |
| 148 | 2 claims, 1 year | 2 claims, 1 year | 148 = Malignant Neoplasms: Hypopharynx | CCW Codebook | Cancer-related condition |
| 149 | 2 claims, 1 year | 2 claims, 1 year | 149 = Malignant Neoplasms: Other and ill-defined sites within the lip, oral cavity, and pharynx | CCW Codebook | Cancer-related condition |
| 150 | 2 claims, 1 year | 2 claims, 1 year | 150 = Malignant Neoplasms: Esophagus | CCW Codebook | Cancer-related condition |
| 151 | 2 claims, 1 year | 2 claims, 1 year | 151 = Malignant Neoplasms: Stomach | CCW Codebook | Cancer-related condition |
| 152 | 2 claims, 1 year | 2 claims, 1 year | 152 = Malignant Neoplasms: Small intestine, including duodenum | CCW Codebook | Cancer-related condition |
| 153 | 2 claims, 1 year | 2 claims, 1 year | 153 = Malignant Neoplasms: Large intestine - excluding rectum | CCW Codebook | Cancer-related condition |
| 154 | 2 claims, 1 year | 2 claims, 1 year | 154 = Malignant Neoplasms: Rectum, rectosigmoid and anus | CCW Codebook | Cancer-related condition |
| 155 | 2 claims, 1 year | 2 claims, 1 year | 155 = Malignant Neoplasms: Primary malignancy of liver (not secondary spread or metastatic disease) | CCW Codebook | Cancer-related condition |
| 156 | 2 claims, 1 year | 2 claims, 1 year | 156 = Malignant Neoplasms: Gallbladder and extra hepatic bile ducts | CCW Codebook | Cancer-related condition |
| 157 | 2 claims, 1 year | 2 claims, 1 year | 157 = Malignant Neoplasms: Pancreas | CCW Codebook | Cancer-related condition |
| 158 | 2 claims, 1 year | 2 claims, 1 year | 158 = Malignant Neoplasms: Retroperitoneum and peritoneum | CCW Codebook | Cancer-related condition |
| 159 | 2 claims, 1 year | 2 claims, 1 year | 159 = Malignant Neoplasms: Other and ill-defined sites within the digestive organs and peritoneum | CCW Codebook | Cancer-related condition |
| 160 | 2 claims, 1 year | 2 claims, 1 year | 160 = Malignant Neoplasms: Nasal cavities, middle ear, and accessory sinuses | CCW Codebook | Cancer-related condition |
| 161 | 2 claims, 1 year | 2 claims, 1 year | 161 = Malignant Neoplasms: Larynx, trachea | CCW Codebook | Cancer-related condition |
| 162 | 2 claims, 1 year | 2 claims, 1 year | 162 = Malignant Neoplasms: Bronchus, lung | CCW Codebook | Cancer-related condition |
| 163 | 2 claims, 1 year | 2 claims, 1 year | 163 = Malignant Neoplasms: Pleura | CCW Codebook | Cancer-related condition |
| 164 | 2 claims, 1 year | 2 claims, 1 year | 164 = Malignant Neoplasms: Thymus, heart, and mediastinum | CCW Codebook | Cancer-related condition |
| 165 | 2 claims, 1 year | 2 claims, 1 year | 165 = Malignant Neoplasms: Other sites within the respiratory system and intrathoracic organs | CCW Codebook | Cancer-related condition |
| 170 | 2 claims, 1 year | 2 claims, 1 year | 170 = Malignant Neoplasms: Bone | CCW Codebook | Cancer-related condition |
| 171 | 2 claims, 1 year | 2 claims, 1 year | 171 = Malignant Neoplasms: Connective and other soft tissue | CCW Codebook | Cancer-related condition |
| 172 | 2 claims, 1 year | 2 claims, 1 year | 172 = Malignant Neoplasms: Melanoma of skin | CCW Codebook | Cancer-related condition |
| 173 | 2 claims, 1 year | 2 claims, 1 year | 173 = Malignant Neoplasms: Other skin malignancies | CCW Codebook | Cancer-related condition |
| 174 | 2 claims, 1 year | 2 claims, 1 year | 174 = Malignant Neoplasms: Female breast | CCW Codebook | Cancer-related condition |
| 175 | 2 claims, 1 year | 2 claims, 1 year | 175 = Malignant Neoplasms: Male breast | CCW Codebook | Cancer-related condition |
| 179 | 2 claims, 1 year | 2 claims, 1 year | 179 = Malignant Neoplasms: Uterus, part unspecified | CCW Codebook | Cancer-related condition |
| 180 | 2 claims, 1 year | 2 claims, 1 year | 180 = Malignant Neoplasms: Cervix | CCW Codebook | Cancer-related condition |
| 181 | 2 claims, 1 year | 2 claims, 1 year | 181 = Malignant Neoplasms: Placenta | CCW Codebook | Cancer-related condition |
| 182 | 2 claims, 1 year | 2 claims, 1 year | 182 = Malignant Neoplasms: Body of uterus | CCW Codebook | Cancer-related condition |
| 183 | 2 claims, 1 year | 2 claims, 1 year | 183 = Malignant Neoplasms: Ovary, fallopian tube, broad ligament | CCW Codebook | Cancer-related condition |
| 184 | 2 claims, 1 year | 2 claims, 1 year | 184 = Malignant Neoplasms: Vagina, vulva, other female genital organs | CCW Codebook | Cancer-related condition |
| 185 | 2 claims, 1 year | 2 claims, 1 year | 185 = Malignant Neoplasms: Prostate | CCW Codebook | Cancer-related condition |
| 186 | 2 claims, 1 year | 2 claims, 1 year | 186 = Malignant Neoplasms: Testis | CCW Codebook | Cancer-related condition |
| 187 | 2 claims, 1 year | 2 claims, 1 year | 187 = Malignant Neoplasms: Other male genital organs | CCW Codebook | Cancer-related condition |
| 188 | 2 claims, 1 year | 2 claims, 1 year | 188 = Malignant Neoplasms: Bladder | CCW Codebook | Cancer-related condition |
| 189 | 2 claims, 1 year | 2 claims, 1 year | 189 = Malignant Neoplasms: Kidney, other urinary organs | CCW Codebook | Cancer-related condition |
| 190 | 2 claims, 1 year | 2 claims, 1 year | 190 = Malignant Neoplasms: Eye | CCW Codebook | Cancer-related condition |
| 191 | 2 claims, 1 year | 2 claims, 1 year | 191 = Malignant Neoplasms: Brain | CCW Codebook | Cancer-related condition |
| 192 | 2 claims, 1 year | 2 claims, 1 year | 192 = Malignant Neoplasms: Cranial nerves, spinal cord, other parts of nervous system | CCW Codebook | Cancer-related condition |
| 193 | 2 claims, 1 year | 2 claims, 1 year | 193 = Malignant Neoplasms: Thyroid | CCW Codebook | Cancer-related condition |
| 194 | 2 claims, 1 year | 2 claims, 1 year | 194 = Malignant Neoplasms: Other endocrine glands and related structures | CCW Codebook | Cancer-related condition |
| 195 | 2 claims, 1 year | 2 claims, 1 year | 195 = Malignant Neoplasms: Other ill-defined sites | CCW Codebook | Cancer-related condition |
| 196 | 2 claims, 1 year | 2 claims, 1 year | 196 = Malignant Neoplasms: Secondary neoplasm of lymph nodes | CCW Codebook | Cancer-related condition |
| 197 | 2 claims, 1 year | 2 claims, 1 year | 197 = Malignant Neoplasms: Secondary neoplasm of respiratory and digestive systems | CCW Codebook | Cancer-related condition |
| 198 | 2 claims, 1 year | 2 claims, 1 year | 198 = Malignant Neoplasms: Metastatic or secondary malignant neoplasm, carcinomatosis | CCW Codebook | Cancer-related condition |
| 199 | 2 claims, 1 year | 2 claims, 1 year | 199 = Malignant Neoplasms: Other malignant neoplasms | CCW Codebook | Cancer-related condition |
| 200 | 2 claims, 1 year | 2 claims, 1 year | 200 = Malignant Neoplasms: Lymphosarcoma, reticulosarcoma | CCW Codebook | Cancer-related condition |
| 201 | 2 claims, 1 year | 2 claims, 1 year | 201 = Malignant Neoplasms: Hodgkin's disease | CCW Codebook | Cancer-related condition |
| 202 | 2 claims, 1 year | 2 claims, 1 year | 202 = Malignant Neoplasms: Other malignant neoplasms of lymphoid and histiocytic tissue | CCW Codebook | Cancer-related condition |
| 203 | 2 claims, 1 year | 2 claims, 1 year | 203 = Malignant Neoplasms: Multiple myeloma, plasma cell leukemia | CCW Codebook | Cancer-related condition |
| 204 | 2 claims, 1 year | 2 claims, 1 year | 204 = Malignant Neoplasms: Lymphoid leukemia (including lymphatic and histiocytic leukemia) | CCW Codebook | Cancer-related condition |
| 205 | 2 claims, 1 year | 2 claims, 1 year | 205 = Malignant Neoplasms: Myeloid leukemia (including granulocytic and myelogenous leukemia) | CCW Codebook | Cancer-related condition |
| 206 | 2 claims, 1 year | 2 claims, 1 year | 206 = Malignant Neoplasms: Monocytic leukemia | CCW Codebook | Cancer-related condition |
| 207 | 2 claims, 1 year | 2 claims, 1 year | 207 = Malignant Neoplasms: Other specified leukemia | CCW Codebook | Cancer-related condition |
| 208 | 2 claims, 1 year | 2 claims, 1 year | 208 = Malignant Neoplasms: Other types of leukemia | CCW Codebook | Cancer-related condition |
| 210 | 2 claims, 1 year | 2 claims, 1 year | 210 = Benign Neoplasms: Lip, oral cavity, pharynx | CCW Codebook | Cancer-related condition |
| 211 | 2 claims, 1 year | 2 claims, 1 year | 211 = Benign Neoplasms: Other parts of digestive system, peritoneum | CCW Codebook | Cancer-related condition |
| 212 | 2 claims, 1 year | 2 claims, 1 year | 212 = Benign Neoplasms: Respiratory and intra-thoracic organs | CCW Codebook | Cancer-related condition |
| 213 | 2 claims, 1 year | 2 claims, 1 year | 213 = Benign Neoplasms: Bone, cartilage | CCW Codebook | Cancer-related condition |
| 214 | 2 claims, 1 year | 2 claims, 1 year | 214 = Benign Neoplasms: Lipoma | CCW Codebook | Cancer-related condition |
| 215 | 2 claims, 1 year | 2 claims, 1 year | 215 = Benign Neoplasms: Connective and other soft tissue | CCW Codebook | Cancer-related condition |
| 216 | 2 claims, 1 year | 2 claims, 1 year | 216 = Benign Neoplasms: Skin (e.g., pigmented naevus, dermatofibroma) | CCW Codebook | Cancer-related condition |
| 217 | 2 claims, 1 year | 2 claims, 1 year | 217 = Benign Neoplasms: Breast | CCW Codebook | Cancer-related condition |
| 218 | 2 claims, 1 year | 2 claims, 1 year | 218 = Benign Neoplasms: Uterine fibroid, leiomyoma | CCW Codebook | Cancer-related condition |
| 219 | 2 claims, 1 year | 2 claims, 1 year | 219 = Benign Neoplasms: Other benign neoplasms of uterus (e.g., cervical polyp) | CCW Codebook | Cancer-related condition |
| 220 | 2 claims, 1 year | 2 claims, 1 year | 220 = Benign Neoplasms: Ovary (e.g., ovarian cyst) | CCW Codebook | Cancer-related condition |
| 221 | 2 claims, 1 year | 2 claims, 1 year | 221 = Benign Neoplasms: Other benign neoplasms of female genital organs | CCW Codebook | Cancer-related condition |
| 222 | 2 claims, 1 year | 2 claims, 1 year | 222 = Benign Neoplasms: Benign neoplasms of male genital organs | CCW Codebook | Cancer-related condition |
| 223 | 2 claims, 1 year | 2 claims, 1 year | 223 = Benign Neoplasms: Kidney, ureter, bladder | CCW Codebook | Cancer-related condition |
| 224 | 2 claims, 1 year | 2 claims, 1 year | 224 = Benign Neoplasms: Eye | CCW Codebook | Cancer-related condition |
| 225 | 2 claims, 1 year | 2 claims, 1 year | 225 = Benign Neoplasms: Brain, spinal cord, peripheral nerves | CCW Codebook | Cancer-related condition |
| 226 | 2 claims, 1 year | 2 claims, 1 year | 226 = Benign Neoplasms: Thyroid (e.g., adenoma or cystadenoma) | CCW Codebook | Cancer-related condition |
| 227 | 2 claims, 1 year | 2 claims, 1 year | 227 = Benign Neoplasms: Other endocrine glands and related structures | CCW Codebook | Cancer-related condition |
| 228 | 2 claims, 1 year | 2 claims, 1 year | 228 = Benign Neoplasms: Haemangioma and lymphangioma | CCW Codebook | Cancer-related condition |
| 229 | 2 claims, 1 year | 2 claims, 1 year | 229 = Benign Neoplasms: Other benign neoplasms | CCW Codebook | Cancer-related condition |
| 230 | 2 claims, 1 year | 2 claims, 1 year | 230 = Carcinoma in Situ: Digestive organs | CCW Codebook | Cancer-related condition |
| 231 | 2 claims, 1 year | 2 claims, 1 year | 231 = Carcinoma in Situ: Respiratory system | CCW Codebook | Cancer-related condition |
| 232 | 2 claims, 1 year | 2 claims, 1 year | 232 = Carcinoma in Situ: Skin | CCW Codebook | Cancer-related condition |
| 233 | 2 claims, 1 year | 2 claims, 1 year | 233 = Carcinoma in Situ: Breast and genito-urinary system | CCW Codebook | Cancer-related condition |
| 234 | 2 claims, 1 year | 2 claims, 1 year | 234 = Carcinoma in Situ: Other | CCW Codebook | Cancer-related condition |
| 235 | 2 claims, 1 year | 2 claims, 1 year | 235 = Neoplasms of Uncertain Behavior: Digestive and respiratory systems | CCW Codebook | Cancer-related condition |
| 236 | 2 claims, 1 year | 2 claims, 1 year | 236 = Neoplasms of Uncertain Behavior: Genitourinary organs | CCW Codebook | Cancer-related condition |
| 237 | 2 claims, 1 year | 2 claims, 1 year | 237 = Neoplasms of Uncertain Behavior: Endocrine glands and nervous system | CCW Codebook | Cancer-related condition |
| 238 | 2 claims, 1 year | 2 claims, 1 year | 238 = Neoplasms of Uncertain Behavior: Other and unspecified sites and tissues | CCW Codebook | Cancer-related condition |
| 239 | 2 claims, 1 year | 2 claims, 1 year | 239 = Neoplasms of Uncertain Behavior: Unspecified neoplasms (e.g., polycythemia vera) | CCW Codebook | Cancer-related condition |
| 243 | 2 claims, 1 year | 2 claims, 1 year | 243 = Congenital hypothyroidism | CCW Codebook | Existing rule |
| 493 | 2 claims, 1 year | 2 claims, 1 year | 493.00-493.92 = Asthma | CCW Codebook | Existing rule |
| 42 | 1 claim, 1 year | 1 claim, 1 year | 042 = Human immunodeficiency virus (HIV) infection | Sankaranantham, M. (2019). HIV–Is a cure possible?. Indian journal of sexually transmitted diseases and AIDS, 40(1), 1. | Incurable or irreversible condition |
| 43 | 1 claim, 1 year | 1 claim, 1 year | 043 = AIDS-related complex (A.R.C.) | Sankaranantham, M. (2019). HIV–Is a cure possible?. Indian journal of sexually transmitted diseases and AIDS, 40(1), 1. | Incurable or irreversible condition |
| 44 | 1 claim, 1 year | 1 claim, 1 year | 044 = Other human immunodeficiency virus infection | Sankaranantham, M. (2019). HIV–Is a cure possible?. Indian journal of sexually transmitted diseases and AIDS, 40(1), 1. | Incurable or irreversible condition |
| 135 | 1 claim, 1 year | 1 claim, 1 year | 135 = Sarcoidosis | Baughman, R. P., Costabel, U., & du Bois, R. M. (2008). Treatment of sarcoidosis. Clinics in chest medicine, 29(3), 533-548. | Incurable or irreversible condition |
| 249 | 1 claim, 1 year | 1 claim, 1 year | 249.00-249.91 = Secondary diabetes mellitus | CCW Codebook | Existing rule |
| 250 | 1 claim, 1 year | 1 claim, 1 year | 250.00-250.93 = Diabetes mellitus | CCW Codebook | Existing rule |
| 330 | 1 claim, 1 year | 1 claim, 1 year | 330.0-330.9 = Cerebral degeneration usually manifest in childhood | Baltanás, F. C., Berciano, M. T., Santos, E., & Lafarga, M. (2021). The childhood-onset neurodegeneration with cerebellar atrophy (Condca) disease caused by agtpbp1 gene mutations: The purkinje cell degeneration mouse as an animal model for the study of this human disease. Biomedicines, 9(9), 1157. | Incurable or irreversible condition |
| 332 | 1 claim, 1 year | 1 claim, 1 year | 332.0, 332.1 = Parkinson’s disease | Bloem, B. R., Okun, M. S., & Klein, C. (2021). Parkinson's disease. The Lancet, 397(10291), 2284-2303. | Incurable or irreversible condition |
| 334 | 1 claim, 1 year | 1 claim, 1 year | 334 = Spinocerebellar disease | Bhandari, J., Thada, P. K., & Samanta, D. (2020). Spinocerebellar ataxia. | Incurable or irreversible condition |
| 335 | 1 claim, 1 year | 1 claim, 1 year | 335.0-335.9 = Anterior horn cell disease | Anderson, J. R., & Anderson, J. R. (1985). Motor Neuron Disease. Atlas of Skeletal Muscle Pathology, 37-43. | Incurable or irreversible condition |
| 343 | 1 claim, 1 year | 1 claim, 1 year | 343.0-343.9 = Infantile cerebral palsy | Brooks, J. C., Strauss, D. J., Shavelle, R. M., Tran, L. M., Rosenbloom, L., & Wu, Y. W. (2014). Recent trends in cerebral palsy survival. Part II: individual survival prognosis. Developmental Medicine & Child Neurology, 56(11), 1065-1071. | Incurable or irreversible condition |
| 345 | 1 claim, 1 year | 1 claim, 1 year | 345.01, 345.11, 345.3, 345.41, 345.61, 345.71, 345.81, 345.91 = Epilepsy | Cleveland Clinic. (2022). Epilepsy. https://my.clevelandclinic.org/health/diseases/17636-epilepsy | Incurable or irreversible condition |
| 416 | 1 claim, 1 year | 1 claim, 1 year | 416.1, 416.2, 416.8, 416.9 = Chronic pulmonary heart disease | Berger, J. S., Sanborn, T. A., Sherman, W., & Brown, D. L. (2004). Effect of chronic obstructive pulmonary disease on survival of patients with coronary heart disease having percutaneous coronary intervention. *The American journal of cardiology*, *94*(5), 649-651. | Incurable or irreversible condition |
| 491 | 1 claim, 1 year | 1 claim, 1 year | 491.0-491.9 = Chronic bronchitis | Kim, V., & Criner, G. J. (2013). Chronic bronchitis and chronic obstructive pulmonary disease. American journal of respiratory and critical care medicine, 187(3), 228-237. | Incurable or irreversible condition |
| 555 | 1 claim, 1 year | 1 claim, 1 year | 555.0 = Regional enteritis | Roda, G., Chien Ng, S., Kotze, P.G. et al. Crohn’s disease. Nat Rev Dis Primers 6, 22 (2020). https://doi.org/10.1038/s41572-020-0156-2 | Incurable or irreversible condition |
| 556 | 1 claim, 1 year | 1 claim, 1 year | 556.9 = Ulcerative colitis | Rogler, G. (2014). Chronic ulcerative colitis and colorectal cancer. Cancer letters, 345(2), 235-241. | Incurable or irreversible condition |
| 571 | 1 claim, 1 year | 1 claim, 1 year | 571.4-571.9 = Chronic liver disease and cirrhosis | Schuppan, D., & Afdhal, N. H. (2008). Liver cirrhosis. The Lancet, 371(9615), 838-851. | Incurable or irreversible condition |
| 741 | 1 claim, 1 year | 1 claim, 1 year | 741.0-741.9 = Spina bifida | Bellin, M. H., Kovacs, P. J., & Sawin, K. J. (2008). Risk and protective influences in the lives of siblings of youths with spina bifida. Health & Social Work, 33(3), 199-209. | Incurable or irreversible condition |
| 758 | 1 claim, 1 year | 1 claim, 1 year | 758.0-758.9 = Chromosomal anomalies | McFadden, D. E., & Friedman, J. M. (1997). Chromosome abnormalities in human beings. Mutation Research/Fundamental and Molecular Mechanisms of Mutagenesis, 396(1-2), 129-140. | Incurable or irreversible condition |
| 780 | 1 claim, 1 year | 1 claim, 1 year | 780.03 = Persistent vegetative state | Multi-Society Task Force on PVS. (1994). Medical aspects of the persistent vegetative state. New England Journal of Medicine, 330(21), 1499-1508. | Incurable or irreversible condition |
| 585 | 2 claims, 2 years | 2 claims, 2 years | 585 = Chronic kidney disease | CCW Codebook | Existing rule |
| 1 | 2 claims, 2,3 or 4 | 3 claims, 3 years | 001.52, 001.53 = Cholera | Focareta, A., Paton, J. C., Morona, R., Cook, J., & Paton, A. W. (2006). A recombinant probiotic for treatment and prevention of cholera. *Gastroenterology*, *130*(6), 1688-1695. | Curable |
| 6 | 2 claims, 2,3 or 4 | 3 claims, 3 years | 006.4, 006.52, 006.81 = Amebiasis | Guarner, V. (2020). Treatment and Prevention of Amebiasis. In *Amebiasis* (pp. 221-238). CRC Press. | Curable |
| 7 | 2 claims, 2,3 or 4 | 3 claims, 3 years | 007.3, 007.64, 007.65, 007.68, 007.69 = Other protozoal intestinal diseases | N/A | Multiple conditions/subcategories |
| 30 | 2 claims, 2,3 or 4 | 3 claims, 3 years | 030.3, 030.4 = Leprosy | Kar, H. K., & Gupta, R. (2015). Treatment of leprosy. Clinics in dermatology, 33(1), 55-65. | Curable |
| 32 | 2 claims, 2,3 or 4 | 3 claims, 3 years | 032.4, 032.41, 032.49, 032.5, 032.50, 032.59 = Diphtheria | Burkovski, A. (2014). Diphtheria and its etiological agents. Corynebacterium diphtheriae and Related Toxigenic Species: Genomics, Pathogenicity and Applications, 1-14. | Curable |
| 35 | 2 claims, 2,3 or 4 | 3 claims, 3 years | 035.8, 035.81, 035.82, 035.83, 035.84 = Erysipelas | Brindle, R., Williams, O. M., Barton, E., & Featherstone, P. (2019). Assessment of antibiotic treatment of cellulitis and erysipelas: a systematic review and meta-analysis. *JAMA dermatology*, *155*(9), 1033-1040. | Curable |
| 41 | 2 claims, 2,3 or 4 | 3 claims, 3 years | 041.5 = H. influenzae infect not otherwise specified (NOS) | Alexander, H. E. (1943). Experimental basis for treatment of Haemophilus influenzae infections. American Journal of Diseases of Children, 66(2), 160-171. | Curable |
| 55 | 2 claims, 2,3 or 4 | 3 claims, 3 years | 055.5, 055.51, 055.52, 055.53, 055.54 = Measles | Moench, T. R., Griffin, D. E., Obriecht, C. R., Vaisberg, A. J., & Johnson, R. T. (1988). Acute measles in patients with and without neurological involvement: distribution of measles virus antigen and RNA. *Journal of Infectious Diseases*, *158*(2), 433-442. | Curable |
| 56 | 2 claims, 2,3 or 4 | 3 claims, 3 years | 056.4, 056.41, 056.42, 056.7, 056.71, 056.79 = Rubella | Böttiger, B., & Jensen, I. P. (1997). Maturation of rubella IgG avidity over time after acute rubella infection. *Clinical and diagnostic virology*, *8*(2), 105-111. | Curable |
| 57 | 2 claims, 2,3 or 4 | 3 claims, 3 years | 057.7, 057.71, 057.79 = Other viral exanthemata | N/A | Multiple conditions/subcategories |
| 62 | 2 claims, 2,3 or 4 | 3 claims, 3 years | 062.4, 062.41 = Mosquito-borne viral encephalitis | Hinson, V. K., & Tyor, W. R. (2001). Update on viral encephalitis. *Current opinion in neurology*, *14*(3), 369-374. | Curable |
| 64 | 2 claims, 2,3 or 4 | 3 claims, 3 years | 064.5 = Viral encephalitis transmitted by other and unspecified arthropods | Hinson, V. K., & Tyor, W. R. (2001). Update on viral encephalitis. *Current opinion in neurology*, *14*(3), 369-374. | Curable |
| 65 | 2 claims, 2,3 or 4 | 3 claims, 3 years | 065.5, 065.51, 065.53, 065.6, 065.61, 065.63 = Anthropod-borne hemorrhagic fever | Artsob, H. (2000). Arthropod-borne disease in Canada: A clinician's perspective from the ‘Cold Zone’. Paediatrics & child health, 5(4), 206-212. | Curable |
| 253 | 2 claims, 2,3 or 4 | 3 claims, 3 years | 253.2, 253.5, 253.6, 253.9 = Disorders of the pituitary gland and its hypothalamic control | N/A | Multiple conditions/subcategories |
| 255 | 2 claims, 2,3 or 4 | 3 claims, 3 years | 255.0, 255.13, 255.2 = Disorders of adrenal glands | N/A | Multiple conditions/subcategories |
| 259 | 2 claims, 2,3 or 4 | 3 claims, 3 years | 259.4 = Other endocrine disorders | N/A | Multiple conditions/subcategories |
| 270 | 2 claims, 2,3 or 4 | 3 claims, 3 years | 270.0-270.9 = Disorders of amino-acid transport and metabolism | N/A | Multiple conditions/subcategories |
| 271 | 2 claims, 2,3 or 4 | 3 claims, 3 years | 271.0-271.9 = Disorders of carbohydrate transport and metabolism | N/A | Multiple conditions/subcategories |
| 272 | 2 claims, 2,3 or 4 | 3 claims, 3 years | 272.0-272.9 = Disorders of lipoid metabolism | N/A | Multiple conditions/subcategories |
| 275 | 2 claims, 2,3 or 4 | 3 claims, 3 years | 275.0-275.3 = Disorders of mineral metabolism | N/A | Multiple conditions/subcategories |
| 277 | 2 claims, 2,3 or 4 | 3 claims, 3 years | 277.2, 277.3, 277.5, 277.6, 277.8, 277.9 = Other and unspecified disorders of metabolism 277.0 = Cystic fibrosis | N/A | Multiple conditions/subcategories |
| 278 | 2 claims, 2,3 or 4 | 3 claims, 3 years | 278 = Obesity | Rippe, J. M., Crossley, S., & Ringer, R. (1998). Obesity as a Chronic Disease. Journal of the American Dietetic Association, 98(10), S9–S15. https://doi.org/10.1016/S0002-8223(98)00704-4 | Curable |
| 279 | 2 claims, 2,3 or 4 | 3 claims, 3 years | 279.0-279.9 = Disorders involving the immune mechanism | N/A | Multiple conditions/subcategories |
| 282 | 2 claims, 2,3 or 4 | 3 claims, 3 years | 282.0-282.6 = Hereditary hemolytic anemias | N/A | Multiple conditions/subcategories |
| 284 | 2 claims, 2,3 or 4 | 3 claims, 3 years | 284 = Aplastic anemia and other bone marrow failure syndromes | N/A | Multiple conditions/subcategories |
| 286 | 2 claims, 2,3 or 4 | 3 claims, 3 years | 286.0, 286.3 = Coagulation defects | N/A | Multiple conditions/subcategories |
| 287 | 2 claims, 2,3 or 4 | 3 claims, 3 years | 287.32, 287.33, 287.39 = Purpura and other hemorrhagic conditions | N/A | Multiple conditions/subcategories |
| 288 | 2 claims, 2,3 or 4 | 3 claims, 3 years | 288.1, 288.2, 288.4 = Diseases of white blood cells | N/A | Multiple conditions/subcategories |
| 327 | 2 claims, 2,3 or 4 | 3 claims, 3 years | 327.25 = Organic sleep disorders | N/A | Multiple conditions/subcategories |
| 331 | 2 claims, 2,3 or 4 | 3 claims, 3 years | 331.1, 331.11, 331.19, 331.4, 331.8, 331.89, 331.9 = Other cerebral degenerations | N/A | Multiple conditions/subcategories |
| 333 | 2 claims, 2,3 or 4 | 3 claims, 3 years | 333.0, 333.2, 333.4, 333.5, 333.7, 333.9 = Other extrapyramidal disease and abnormal movement disorders | N/A | Multiple conditions/subcategories |
| 336 | 2 claims, 2,3 or 4 | 3 claims, 3 years | 336.1, 336.8 = Other diseases of spinal cord | N/A | Multiple conditions/subcategories |
| 337 | 2 claims, 2,3 or 4 | 3 claims, 3 years | 337.9 = Disorders of autonomic nervous system | N/A | Multiple conditions/subcategories |
| 341 | 2 claims, 2,3 or 4 | 3 claims, 3 years | 341.8 = Other demyelinating diseases of central nervous system | N/A | Multiple conditions/subcategories |
| 342 | 2 claims, 2,3 or 4 | 3 claims, 3 years | 342.90 = Hemiplegia and hemiparesis | N/A | Multiple conditions/subcategories |
| 344 | 2 claims, 2,3 or 4 | 3 claims, 3 years | 344.0, 344.61, 344.81, 344.9 = Other paralytic syndromes | N/A | Multiple conditions/subcategories |
| 348 | 2 claims, 2,3 or 4 | 3 claims, 3 years | 348.1, 348.4 = Other conditions of brain | N/A | Multiple conditions/subcategories |
| 349 | 2 claims, 2,3 or 4 | 3 claims, 3 years | 349 = Other and unspecified disorders of the nervous system | N/A | Multiple conditions/subcategories |
| 359 | 2 claims, 2,3 or 4 | 3 claims, 3 years | 359.0-359.3 = Muscular dystrophies and other myopathies | N/A | Multiple conditions/subcategories |
| 372 | 2 claims, 2,3 or 4 | 3 claims, 3 years | 372 = Conjunctiva disorders (e.g., conjunctivitis, pterygium) | Bernauer, W., Broadway, D. C., & Wright, P. (1993). Chronic progressive conjunctival cicatrisation. Eye, 7(3), 371–378. https://doi.org/10.1038/eye.1993.75 | Curable |
| 380 | 2 claims, 2,3 or 4 | 3 claims, 3 years | 380 = Otitis externa | Osguthorpe, J., & Nielsen, D. (2011). Otitis externa: Review and clinical update. South African Family Practice, 53(3), 223–229. https://doi.org/10.1080/20786204.2011.10874089 | Curable |
| 381 | 2 claims, 2,3 or 4 | 3 claims, 3 years | 381 = Serous otitis media, eustachian tube disorders (ear infection) | Grahne, B. (1964). Serous Otitis Media. Acta Oto-Laryngologica, 58(1–6), 1–8. https://doi.org/10.3109/00016486409121356 | Curable |
| 382 | 2 claims, 2,3 or 4 | 3 claims, 3 years | 382 = Suppurative otitis media | Verhoeff, M., Van Der Veen, E. L., Rovers, M. M., Sanders, E. A. M., & Schilder, A. G. M. (2006). Chronic suppurative otitis media: A review. International Journal of Pediatric Otorhinolaryngology, 70(1), 1–12. https://doi.org/10.1016/j.ijporl.2005.08.021 | Curable |
| 388 | 2 claims, 2,3 or 4 | 3 claims, 3 years | 388 = Wax or cerumen in ear, other disorders of ear and mastoid, tinnitus | Wallhäusser-Franke, E., D’Amelio, R., Glauner, A., Delb, W., Servais, J. J., Hörmann, K., & Repik, I. (2017). Transition from Acute to Chronic Tinnitus: Predictors for the Development of Chronic Distressing Tinnitus. Frontiers in Neurology, 8, 605. https://doi.org/10.3389/fneur.2017.00605 | Curable |
| 389 | 2 claims, 2,3 or 4 | 3 claims, 3 years | 389 = Deafness | Drury, D. W. (1929). Chronic Deafness. New England Journal of Medicine, 201(5), 206–212. https://doi.org/10.1056/NEJM192908012010502 | Curable |
| 398 | 2 claims, 2,3 or 4 | 3 claims, 3 years | 398 = Other rheumatic heart disease | N/A | Multiple conditions/subcategories |
| 424 | 2 claims, 2,3 or 4 | 3 claims, 3 years | 424.0, 424.2, 424.3 = Other diseases of endocardium | N/A | Multiple conditions/subcategories |
| 425 | 2 claims, 2,3 or 4 | 3 claims, 3 years | 425.0-425.4, 425.8 = Cardiomyopathy | Wexler, R., Elton, T., Pleister, A., & Feldman, D. (2009). Cardiomyopathy: an overview. American family physician, 79(9), 778. | Curable |
| 426 | 2 claims, 2,3 or 4 | 3 claims, 3 years | 426.0 = Conduction disorders | N/A | Multiple conditions/subcategories |
| 427 | 2 claims, 2,3 or 4 | 3 claims, 3 years | 427.4, 427.6-427.9 = Cardiac dysrhythmias | McGuirk, S. M., & Muir, W. W. (1985). Diagnosis and treatment of cardiac arrhythmias. Veterinary Clinics of North America: Equine Practice, 1(2), 353-370. | Curable |
| 428 | 2 claims, 2,3 or 4 | 3 claims, 3 years | 428.0, 428.83 = Heart failure | Guyatt, G. H., & Devereaux, P. J. (2004). A review of heart failure treatment. Mount Sinai Journal of Medicine, 71(1). | Curable |
| 429 | 2 claims, 2,3 or 4 | 3 claims, 3 years | 429.1, 429.3 = Ill-defined descriptions and complications of heart disease 429 = All other forms of heart disease | N/A | Multiple conditions/subcategories |
| 433 | 2 claims, 2,3 or 4 | 3 claims, 3 years | 433.11 = Occlusion and stenosis of precerebral arteries | Krohg-Sørensen, K., Bakke, S. J., & Russell, D. (2007). Operative and endovascular treatment of carotis stenosis--when is it indicated?. *Tidsskrift for den Norske Laegeforening: Tidsskrift for Praktisk Medicin, ny Raekke*, *127*(7), 903-907. | Curable |
| 434 | 2 claims, 2,3 or 4 | 3 claims, 3 years | 434.01, 434.91 = Occlusion of cerebral arteries | Sussman, B. J., & Fitch, T. S. (1958). Thrombolysis with fibrinolysin in cerebral arterial occlusion. *Journal of the American Medical Association*, *167*(14), 1705-1709. | Curable |
| 446 | 2 claims, 2,3 or 4 | 3 claims, 3 years | 446.0, 446.1, 446.21, 446.4, 446.7 = Polyarteritis nodosa and allied conditions | N/A | Multiple conditions/subcategories |
| 447 | 2 claims, 2,3 or 4 | 3 claims, 3 years | 447 = Other disorders of arteries | N/A | Multiple conditions/subcategories |
| 453 | 2 claims, 2,3 or 4 | 3 claims, 3 years | 453.0 = Other venous embolism and thrombosis | N/A | Multiple conditions/subcategories |
| 459 | 2 claims, 2,3 or 4 | 3 claims, 3 years | 459 = Other disorders of circulatory system | N/A | Multiple conditions/subcategories |
| 474 | 2 claims, 2,3 or 4 | 3 claims, 3 years | 474 = Hypertrophy or chronic infection of tonsils and/or adenoids | Önal, M., Yılmaz, T., Bilgiç, E., Müftüoğlu, S. F., Kuşçu, O., & Günaydın, R. Ö. (2015). Apoptosis in chronic tonsillitis and tonsillar hypertrophy. International Journal of Pediatric Otorhinolaryngology, 79(2), 191–195. https://doi.org/10.1016/j.ijporl.2014.12.005 | Curable |
| 477 | 2 claims, 2,3 or 4 | 3 claims, 3 years | 477 = Allergic rhinitis, hay fever | Small, P., Keith, P.K. & Kim, H. Allergic rhinitis. Allergy Asthma Clin Immunol 14 (Suppl 2), 51 (2018). https://doi.org/10.1186/s13223-018-0280-7 | Curable |
| 490 | 2 claims, 2,3 or 4 | 3 claims, 3 years | 490 = Bronchitis not otherwise specified (NOS) | Roth, S., Gonzales, R., Harding-Anderer, T., Bloom Jr, F. J., Graf, T., Stahl, M. S., ... & Metlay, J. P. (2012). Unintended consequences of a quality measure for acute bronchitis. *The American journal of managed care*, *18*(6), e217-24. | Curable |
| 516 | 2 claims, 2,3 or 4 | 3 claims, 3 years | 516.3, 516.31 = Other alveolar and parietoalveolar pneumonopathy | N/A | Multiple conditions/subcategories |
| 518 | 2 claims, 2,3 or 4 | 3 claims, 3 years | 518.84 = Other disease of lung | N/A | Multiple conditions/subcategories |
| 519 | 2 claims, 2,3 or 4 | 3 claims, 3 years | 519.0 = Other diseases of respiratory system | N/A | Multiple conditions/subcategories |
| 536 | 2 claims, 2,3 or 4 | 3 claims, 3 years | 536.4 = Disorders of function of stomach | N/A | Multiple conditions/subcategories |
| 553 | 2 claims, 2,3 or 4 | 3 claims, 3 years | 553.3 = Other hernia of abdominal cavity without mention of obstruction of gangrene | N/A | Multiple conditions/subcategories |
| 557 | 2 claims, 2,3 or 4 | 3 claims, 3 years | 557.1 = Vascular insufficiency of intestine | Williams Jr, L. F. (1971). Vascular insufficiency of the intestines. *Gastroenterology*, *61*(5), 757-777. | Curable |
| 558 | 2 claims, 2,3 or 4 | 3 claims, 3 years | 558.3 = Allergic gastroenteritis and colitis | Karpa, K.D., Paul, I.M., Leckie, J.A. et al. A retrospective chart review to identify perinatal factors associated with food allergies. Nutr J 11, 87 (2012). https://doi.org/10.1186/1475-2891-11-87 | Curable |
| 560 | 2 claims, 2,3 or 4 | 3 claims, 3 years | 560.2 = Intestinal obstruction without mention of hernia | Foster, N. M., McGory, M. L., Zingmond, D. S., & Ko, C. Y. (2006). Small bowel obstruction: a population-based appraisal. *Journal of the American College of Surgeons*, *203*(2), 170-176. | Curable |
| 564 | 2 claims, 2,3 or 4 | 3 claims, 3 years | 564.7 = Functional digestive disorders, not elsewhere classified | N/A | Multiple conditions/subcategories |
| 596 | 2 claims, 2,3 or 4 | 3 claims, 3 years | 596.4, 596.53, 596.54 = Other disorders of bladder | N/A | Multiple conditions/subcategories |
| 626 | 2 claims, 2,3 or 4 | 3 claims, 3 years | 626 = Disorders of menstruation | Goldman, M. B., & Hatch, M. C. (1999). Women and Health—Menstruation and Menstrual Disorders: The Epidemiology of Menstruation and Menstrual Dysfunction. Elsevier. | Curable |
| 691 | 2 claims, 2,3 or 4 | 3 claims, 3 years | 691 = Eczema, atopic dermatitis, neurodermatitis | Ring, J., Alomar, A., Bieber, T., Deleuran, M., Fink‐Wagner, A., Gelmetti, C., ... & Darsow, U. (2012). Guidelines for treatment of atopic eczema (atopic dermatitis) part I. Journal of the European Academy of Dermatology and Venereology, 26(8), 1045-1060. | Curable |
| 693 | 2 claims, 2,3 or 4 | 3 claims, 3 years | 693.1 = Dermatitis due to food | Karpa, K.D., Paul, I.M., Leckie, J.A. et al. A retrospective chart review to identify perinatal factors associated with food allergies. Nutr J 11, 87 (2012). https://doi.org/10.1186/1475-2891-11-87 | Curable |
| 708 | 2 claims, 2,3 or 4 | 3 claims, 3 years | 708 = Allergic urticaria | Zuberbier, T., & Bernstein, J. A. (2018). A comparison of the United States and international perspective on chronic urticaria guidelines. The Journal of Allergy and Clinical Immunology: In Practice, 6(4), 1144-1151. | Curable |
| 710 | 2 claims, 2,3 or 4 | 3 claims, 3 years | 710.0, 710.1, 710.3 = Diffuse diseases of connective tissue | N/A | Multiple conditions/subcategories |
| 737 | 2 claims, 2,3 or 4 | 3 claims, 3 years | 737.3 = Curvature of spine | Janicki, J. A., & Alman, B. (2007). Scoliosis: Review of diagnosis and treatment. Paediatrics & child health, 12(9), 771-776. | Curable |
| 740 | 2 claims, 2,3 or 4 | 3 claims, 3 years | 740.0-740.2 = = Anencephalous and similar anomalies | N/A | Multiple conditions/subcategories |
| 742 | 2 claims, 2,3 or 4 | 3 claims, 3 years | 742.0-742.9 = Other congenital anomalies of nervous system | N/A | Multiple conditions/subcategories |
| 745 | 2 claims, 2,3 or 4 | 3 claims, 3 years | 745.0-745.3, 745.60-745.69 = Bulbus cordis anomalies and anomalies of cardiac septal closure |  | Multiple conditions/subcategories |
| 746 | 2 claims, 2,3 or 4 | 3 claims, 3 years | 746 = Other congenital anomalies of heart | N/A | Multiple conditions/subcategories |
| 747 | 2 claims, 2,3 or 4 | 3 claims, 3 years | 747.1-747.49, 747.81, 747.89 = Other congenital anomalies of circulatory system | N/A | Multiple conditions/subcategories |
| 748 | 2 claims, 2,3 or 4 | 3 claims, 3 years | 748.0-748.9 = Congenital anomalies of respiratory system | N/A | Multiple conditions/subcategories |
| 750 | 2 claims, 2,3 or 4 | 3 claims, 3 years | 750.3 = Other congenital anomalies of upper alimentary tract | N/A | Multiple conditions/subcategories |
| 751 | 2 claims, 2,3 or 4 | 3 claims, 3 years | 751.1-751.9 = Other congenital anomalies of digestive system | N/A | Multiple conditions/subcategories |
| 753 | 2 claims, 2,3 or 4 | 3 claims, 3 years | 753.0-753.9 = Congenital anomalies of urinary system | N/A | Multiple conditions/subcategories |
| 756 | 2 claims, 2,3 or 4 | 3 claims, 3 years | 756.0-756.7= Other congenital musculoskeletal anomalies | N/A | Multiple conditions/subcategories |
| 757 | 2 claims, 2,3 or 4 | 3 claims, 3 years | 757.39 = Congenital anomalies of the integument | N/A | Multiple conditions/subcategories |
| 759 | 2 claims, 2,3 or 4 | 3 claims, 3 years | 759.7-759.9 = Other and unspecified congenital anomalies 759.5 = Tuberous sclerosis | N/A | Multiple conditions/subcategories |
| 764 | 2 claims, 2,3 or 4 | 3 claims, 3 years | 764.01, 764.02, 764.11, 764.12, 764.21, 764.22, 764.91, 764.92 = Slow fetal growth and fetal malnutrition | N/A | Multiple conditions/subcategories |
| 765 | 2 claims, 2,3 or 4 | 3 claims, 3 years | 765.01, 765.02, 765.11, 765.12, 765.21-765.23 = Disorders relating to short gestation and low birthweight | Stewart, A. L., & Reynolds, E. O. R. (1974). Improved prognosis for infants of very low birthweight. Pediatrics, 54(6), 724-735. | Curable |
| 767 | 2 claims, 2,3 or 4 | 3 claims, 3 years | 767.0 = Cerebral hem at birth (birth trauma) 767.4 = Spinal cord injury at birth (birth trauma) | Gupta, R., & Cabacungan, E. T. (2021). Neonatal birth trauma: analysis of yearly trends, risk factors, and outcomes. The Journal of Pediatrics, 238, 174-180. | Curable |
| 768 | 2 claims, 2,3 or 4 | 3 claims, 3 years | 768.5, 768.7, 768.9 = Intrauterine hypoxia and birth asphyxia | Ahearne, C. E., Boylan, G. B., & Murray, D. M. (2016). Short and long term prognosis in perinatal asphyxia: An update. World journal of clinical pediatrics, 5(1), 67. | Curable |
| 770 | 2 claims, 2,3 or 4 | 3 claims, 3 years | 770.2, 770.7 = Other respiratory conditions of fetus and newborn 770.4 = Primary atelectasis (other respiratory conditions of fetus and newborn) | N/A | Multiple conditions/subcategories |
| 771 | 2 claims, 2,3 or 4 | 3 claims, 3 years | 771.0, 771.1 = Infections specific to perinatal period | N/A | Multiple conditions/subcategories |
| 772 | 2 claims, 2,3 or 4 | 3 claims, 3 years | 772.13, 772.14 = Fetal and neonatal hemorrhage | Bertrand, G., & Kaplan, C. (2014). How do we treat fetal and neonatal alloimmune thrombocytopenia?. Transfusion, 54(7), 1698-1703. | Curable |
| 773 | 2 claims, 2,3 or 4 | 3 claims, 3 years | 773.3, 773.4 Hemolytic disease of fetus or newborn, due to isoimmunization | Voto, L. S., Mathet, E. R., Zapaterio, J. L., Orti, J., Lede, R. L., & Margulies, M. (1997). High-dose gammaglobulin (IVIG) followed by intrauterine transfusions (IUTs): a new alternative for the treatment of severe fetal hemolytic disease. | Curable |
| 774 | 2 claims, 2,3 or 4 | 3 claims, 3 years | 774.7 = Other perinatal jaundice | N/A | Multiple conditions/subcategories |
| 776 | 2 claims, 2,3 or 4 | 3 claims, 3 years | 776.5 =Hematological disorders of newborn | N/A | Multiple conditions/subcategories |
| 777 | 2 claims, 2,3 or 4 | 3 claims, 3 years | 777.53 = Perinatal disorders of digestive system | N/A | Multiple conditions/subcategories |
| 778 | 2 claims, 2,3 or 4 | 3 claims, 3 years | 778.0 = Conditions involving the integument and temperature regulation of fetus and newborn | N/A | Multiple conditions/subcategories |
| 779 | 2 claims, 2,3 or 4 | 3 claims, 3 years | 779.7 = Other and ill-defined conditions originating in the perinatal period | N/A | Multiple conditions/subcategories |
| 995 | 2 claims, 2,3 or 4 | 3 claims, 3 years | 995.6 = Anaphylactic shock due to food 995.7 = Other adverse food reactions, not specified elsewhere | N/A | Curable |
| V15 | 2 claims, 2,3 or 4 | 3 claims, 3 years | V15.01 = Allergy to peanut V15.02 = Allergy to milk V15.03 = Allergy to egg V15.04 = Allergy to seafood V15.05 = Allergy to food additives or other nuts | N/A | Curable |

**B.1 Sensitivity Testing**

We compared administrative and survey data in two steps. First, we examined the overall prevalence and patterns of agreement for conditions with an established algorithm. Second, we **added** conditions where the reference period was uncertain. Sensitivity testing was conducted by adjusting the reference period only for conditions where the reference period was uncertain. For example, results that refer to the reference period of 2 years indicate that A) conditions with an established algorithm (e.g., diabetes) were analyzed using the pre-established criteria (e.g., diabetes = 1 claim, 1 year). B) Conditions with uncertain reference periods were analyzed using **2 billing claims in 2 years**. Meanwhile, results that refer to the reference period of 3 years indicate that A) conditions with an established algorithm (e.g., diabetes) were analyzed using the pre-established criteria (e.g., diabetes = 1 claim, 1 year). B) Conditions with uncertain reference periods were analyzed using **2 billing claims in 3 years.**

**References**

Feudtner, C., Feinstein, J. A., Zhong, W., Hall, M., & Dai, D. (2014). Pediatric complex chronic conditions classification system version 2: Updated for ICD-10 and complex medical technology dependence and transplantation. *BMC Pediatrics*, *14*, 199. https://doi.org/10.1186/1471-2431-14-199

**Supplemental Material C: Specific Diagnostic Codes**

**Table C.1** Specific Diagnostic Codes

*Specific Diagnostic Codes*

| **2014 OCHS Item** | **ICD-9 Diagnostic Codes** |
| --- | --- |
| A - Food/digestive allergies | 558, 693, 708, 995, V15 |
| B & C - Respiratory allergies + other allergies | 277, 491, 493, 30, 32, 327, 477, 490, 516, 518, 519, 748, 770 |
| D - Bronchitis | 490, 491 |
| E - Diabetes | 249, 250 |
| F - Heart condition or disease | 416, 35, 398, 424, 425, 426, 427, 428, 429, 429, 433, 447, 459, 745, 746, 747 |
| G - Epilepsy | 345 |
| H - Cerebral palsy | 343 |
| I - Kidney condition or disease | 585, 55, 56, 57, 596, 753 |
| J - Asthma | 493 |
| M - Eczema | 691 |
| K - Other | Remaining codes |

*Note*. ICD-9 Diagnostic Codes are based onFeudtner et al. (2014) categories. For example, the 2014 OCHS item heart condition or disease was matched with conditions of the cardiovascular system.
